# Supplementary material for: BTG1 Expression Correlates with the Pathogenesis and Progression of Ovarian Carcinomas
Source: MDPI journal article supplement (doi:10.3390/ijms141019670), 2013-09-27
Supplement: s1 [file s1]

# Supplementary Information

**Table S1.** Primers used for RT-PCR.

| Primer          | Sequences (forward and reverse) | Distribution | AT (°C) | Product size (bp) | Extension time (s) |
|-----------------|---------------------------------|--------------|---------|-------------------|--------------------|
| <i>BTG1</i>     | 5'-CCCTTCCTGGGCATCGT-3'         | L10240.1     | 60      | 97                | 34                 |
|                 | 5'-CGGCGTCGTCATCATCC-3'         | 645–741      |         |                   |                    |
| <i>PI3K</i>     | 5'-CACCGCATTTGTCGT-3'           | NM_001242466 | 60      | 225               | 34                 |
|                 | 5'-CTCCCACTTCTACGC-3'           | 4016–4240    |         |                   |                    |
| <i>Akt</i>      | 5'-GGGACAGAGGAGCAAGGT-3'        | NM_005163    | 60      | 208               | 34                 |
|                 | 5'-CGACAGCGGAAAGGTAA-3'         | 2656–2863    |         |                   |                    |
| <i>Bcl xl</i>   | 5'-TTCCCAGAAAGGATACAGC-3'       | Z23115       | 60      | 92                | 34                 |
|                 | 5'-GGGTCTCCATCTCCGATT-3'        | 185–276      |         |                   |                    |
| <i>survivin</i> | 5'-CTTGGCCCAGTGTTTCTT-3'        | DQ227257     | 60      | 124               | 34                 |
|                 | 5'-GCTTCCAGTCCCTCCCT-3'         | 159–282      |         |                   |                    |
| <i>VEGF</i>     | 5'-AGGAGGAGGGCAGAATC-3'         | NM_001171630 | 60      | 258               | 34                 |
|                 | 5'-ATGTGCTGGCCTTGGT-3'          | 1131–1388    |         |                   |                    |
| <i>MMP-2</i>    | 5'-GAGCACTCCCAAGACCCT-3'        | NM_001127891 | 60      | 255               | 34                 |
|                 | 5'-AGTCCGCCAAATGAACC-3'         | 1398–1652    |         |                   |                    |
| <i>GAPDH</i>    | 5'-CAATGACCCCTTCATTGACC-3'      | NM_002046.3  | 60      | 135               | 34                 |
|                 | 5'-TGGAAGATGGTGATGGGATT-3'      | 201–335      |         |                   |                    |

AT, annealing temperature; *GADPH*, glyceraldehyde-3-phosphate dehydrogenase.

© 2013 by the authors; licensee MDPI, Basel, Switzerland. This article is an open access article distributed under the terms and conditions of the Creative Commons Attribution license (<http://creativecommons.org/licenses/by/3.0/>).
